# Supplementary material for: Origin, diversity, and biogeography of Antarctic scale worms (Polychaeta: Polynoidae): a wide‐scale barcoding approach
Source: PubMed Central journal article supplement (PMC9288932; doi:10.1002/ece3.9093), 2022-07-17

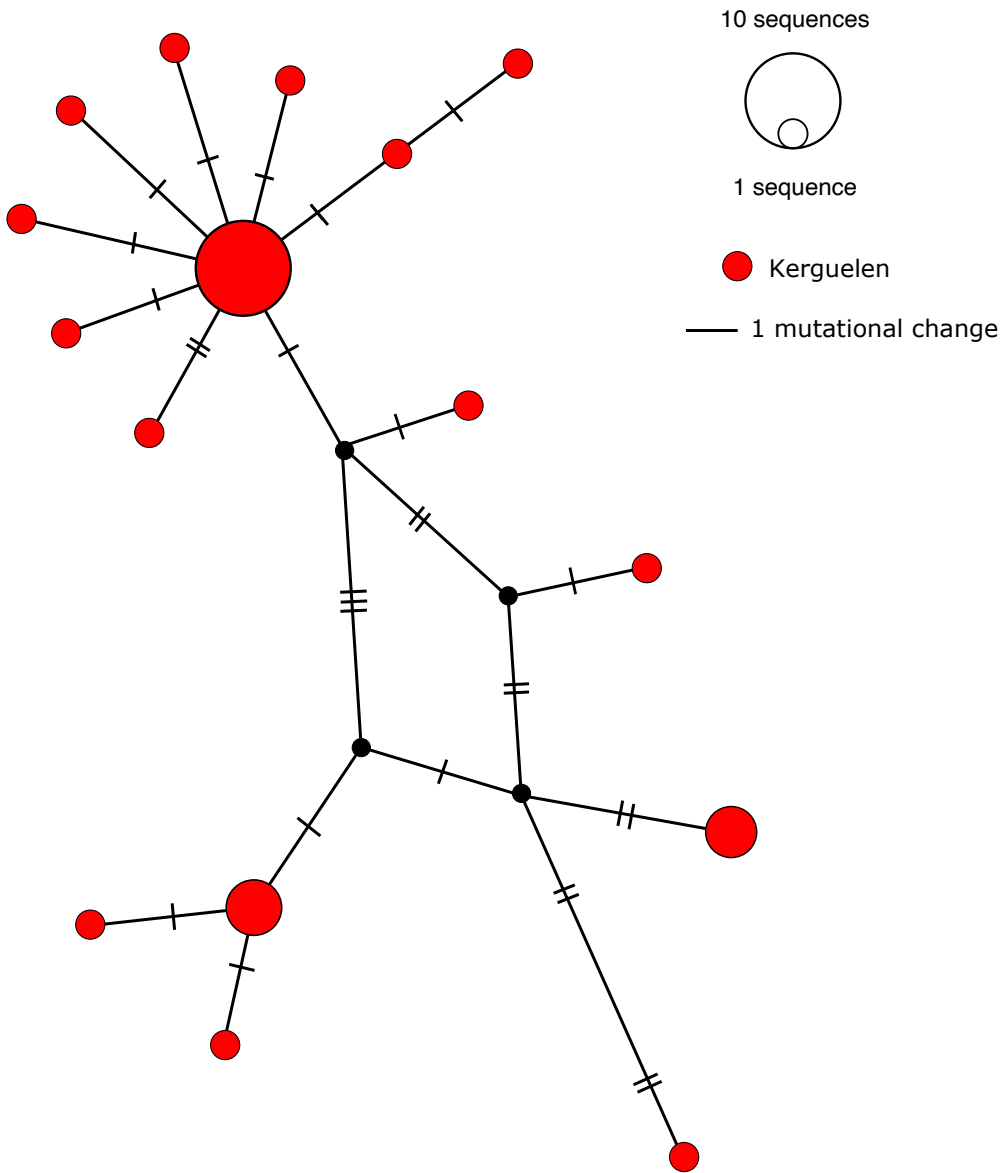

Supplement: ECE3-12-e9093-s002.pdf [file ECE3-12-e9093-s002.pdf]
